# Supplementary material
Source: Springer Nature journal article supplement (https://www.springermedizin.de/resource/supplementary/13054_2011_9633_MOESM6_ESM.pdf/9706660)

# What technique do you use to monitor cardiac output? (please, mark all that apply)

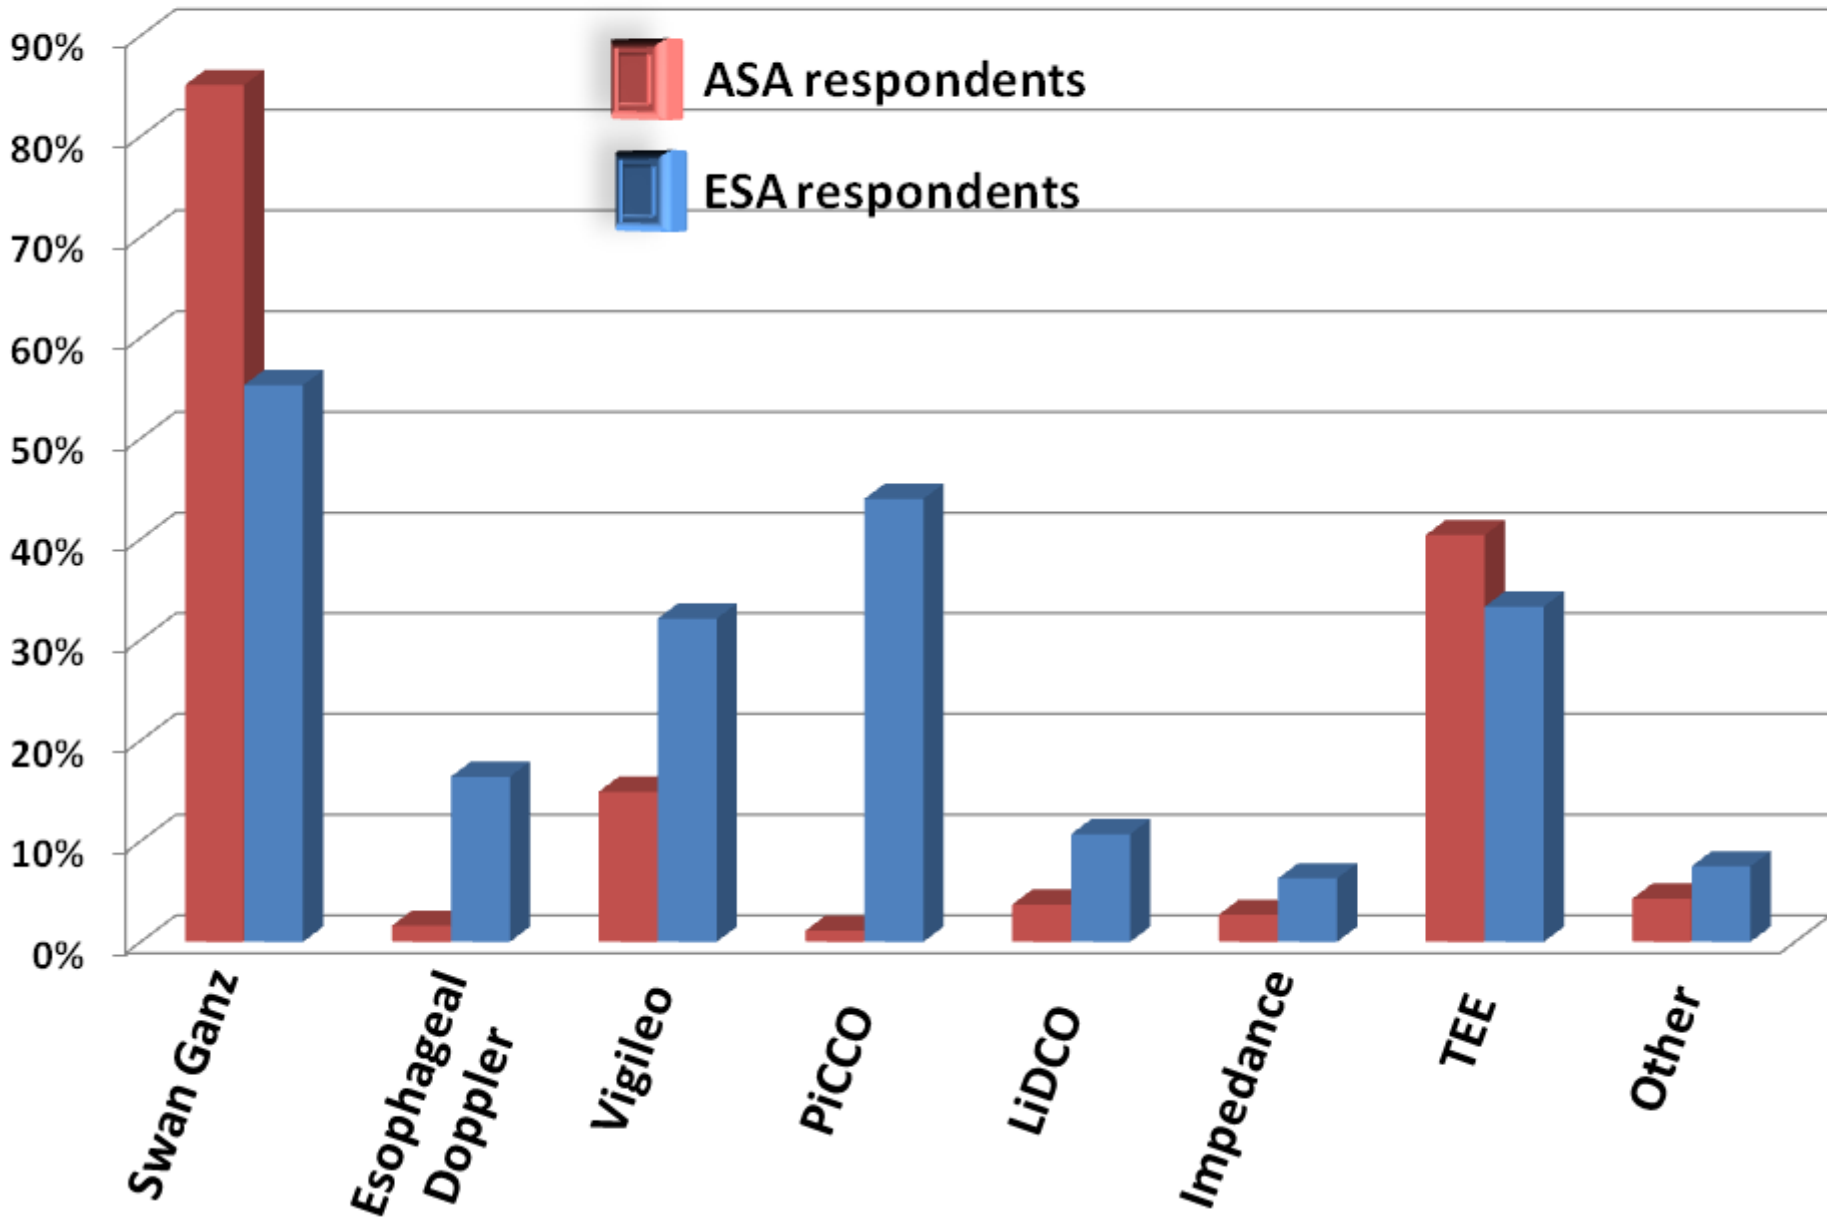

Supplement: MOESM6 [file 9706660]
